# Supplementary material for: Helicobacter pylori Exposure in Nausea and Vomiting of Pregnancy Increases Risk of Preterm Delivery
Source: Hindawi journal article supplement (doi:10.1155/2023/6612268), 2023-09-28
Supplement: f1 [file 6612268.f1.pdf]

| <b>Discovery cohort</b>             |                                |                 |                     |
|-------------------------------------|--------------------------------|-----------------|---------------------|
|                                     | <b><i>H. pylori</i> result</b> |                 |                     |
|                                     | <b>Positive</b>                | <b>Negative</b> | <b>Chi square p</b> |
| Hyperemesis gravidarum              | 17                             | 14              | 0.3                 |
| No hyperemesis gravidarum           | 134                            | 167             |                     |
| <hr/>                               |                                |                 |                     |
| Nausea and vomiting of pregnancy    | 64                             | 78              | 0.9                 |
| No nausea and vomiting of pregnancy | 87                             | 103             |                     |
| <hr/>                               |                                |                 |                     |
| <b>Validation cohort</b>            |                                |                 |                     |
|                                     | <b><i>H. pylori</i> result</b> |                 |                     |
|                                     | <b>Positive</b>                | <b>Negative</b> | <b>Chi square p</b> |
| Hyperemesis gravidarum              | 49                             | 151             | 0.04                |
| No hyperemesis gravidarum           | 2471                           | 10628           |                     |
| <hr/>                               |                                |                 |                     |
| Nausea and vomiting of pregnancy    | 646                            | 2314            | <0.001              |
| No nausea and vomiting of pregnancy | 1874                           | 8465            |                     |

**Table S1.** Two by two contingency tables associating *H. pylori* exposure with nausea and vomiting of pregnancy and hyperemesis gravidarum.
